# Supplementary material for: The histone code reader SPIN1 controls RET signaling in liposarcoma
Source: PubMed Central journal article supplement (PMC4467114; doi:10.18632/oncotarget.3000), 2015-03-05
Supplement: oncotarget-06-4773-s001.pdf [file oncotarget-06-4773-s001.pdf]

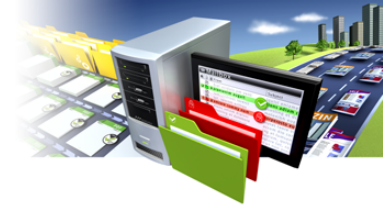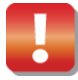

### Errors were found on page 1-15 and in general document properties

-    PDF/X output intent is missing
-    PDF/X version is not PDF/X-1a:2001
-    Resolution of color or grayscale image is less than 300 dpi (106x on pages 1-5,9,11-13)
-    Font Arial-BoldMT, TimesNewRomanPSMT, Arial-BoldItalicMT is a composite font (4123x on pages 1-15)
-    Line weight is less than 0.5 pt (2x on pages 1,11)
-    Line weight is less than 0.5 pt (2x on pages 1,11)
-    Embedded font TimesNewRomanPS-ItalicMT, TimesNewRomanPS-BoldMT, Symbol-Bold, TimesNewRomanPSMT, Arial-BoldMT, Symbol, TimesNewRomanPS-BoldItalicMT, Arial-BoldItalicMT is not complete (4318x on pages 1-15)

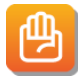

### Warnings

-    Indexed color is used (75x on pages 1-5,7-12)
-    Font Verdana-Bold, TimesNewRomanPSMT, TimesNewRomanPS-ItalicMT, TimesNewRomanPS-BoldMT, TimesNewRomanPS-BoldItalicMT is a TrueType font (211x on pages 1-15)
-    Resolution of color or grayscale image is more than 450 dpi (1x on page 10)
-    Total ink coverage of flat color is more than 310% (11x on page 13)

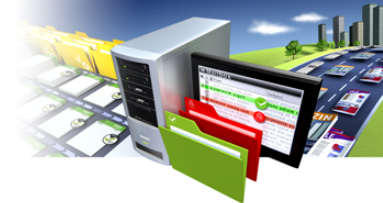

## General File Information

---

### Processing

|                                       |                                                                                     |
|---------------------------------------|-------------------------------------------------------------------------------------|
| Preflight Profile                     | diacriTech McVety-kendel Settings                                                   |
| Created by                            | Hari Raj<br>diacriTech Pvt. Ltd.                                                    |
| Pages processed                       | 1-15                                                                                |
| Application used to preflight         | Enfocus PitStop Server 09, update 3 powered by Enfocus PitStop Library 09, update 3 |
| Application used to create the report | Enfocus PitStop Library 09, update 3                                                |

### Document properties

|                              |                                                                  |
|------------------------------|------------------------------------------------------------------|
| Document Name                | Supplementary.pdf                                                |
| Number of pages              | 15                                                               |
| PDF Version                  | 1.4                                                              |
| Creation Date                | UTC: February 5, 2015 - 07:14:14 [ February 5, 2015 - 12:44:14 ] |
| Modification Date            | UTC: February 5, 2015 - 07:14:36 [ February 5, 2015 - 12:44:36 ] |
| Producer                     | Adobe PDF Library 9.9                                            |
| Creator                      | Adobe InDesign CS5.5 (7.5.3)                                     |
| Author                       | Top                                                              |
| Title                        | Microsoft Word - 100710.docx                                     |
| Subject                      | -                                                                |
| Keywords                     | -                                                                |
| Trapped                      | no                                                               |
| Trapping Information Present | no                                                               |
| Repaired on Open             | no                                                               |
| Optimized for Fast Web View  | yes                                                              |
| Thumbnails Present           | no                                                               |
| Binding                      | left                                                             |
| Job Ticket Present           | no                                                               |

### Security

|                                   |                 |
|-----------------------------------|-----------------|
| Encryption Type                   | not encrypted   |
| Content Copying or Extraction     | allowed         |
| Content Access for Disabled Users | allowed         |
| Adding or Modifying Annotations   | allowed         |
| Creating or Modifying Form Fields | allowed         |
| Form Field Fill-in or Signing     | allowed         |
| Document Assembly                 | allowed         |
| Other Document Modifications      | allowed         |
| Printing                          | high resolution |

### Compression

|                               |           |
|-------------------------------|-----------|
| Data format                   | binary    |
| Document structure compressed | yes       |
| Filters used                  | JPEG, ZIP |



### Defined page boxes

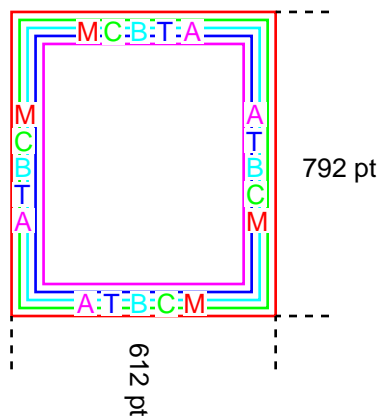

### Effective page boxes

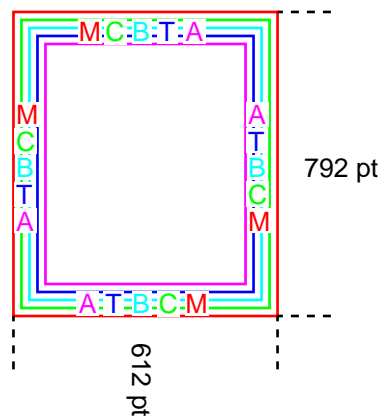

| Page box      | Defined size | Effective size |
|---------------|--------------|----------------|
| Media box (M) | 612 x 792 pt | 612 x 792 pt   |
| Crop box (C)  | 612 x 792 pt | 612 x 792 pt   |
| Trim box (T)  | 612 x 792 pt | 612 x 792 pt   |
| Bleed box (B) | 612 x 792 pt | 612 x 792 pt   |
| Art box (A)   | 612 x 792 pt | 612 x 792 pt   |

Defined for pages 1-15  
 Media box starts at : (0, 0) pt  
 Page rotation : 0 degrees

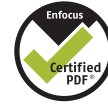

## Font Information

|   | PostScript font name         | Type         | Embedded as | Subset | Encoding   |
|---|------------------------------|--------------|-------------|--------|------------|
| 🔍 | Verdana-Bold                 | TrueType     | TrueType    | no     | WinAnsi    |
| 🔍 | TimesNewRomanPS-BoldMT       | TrueType     | TrueType    | yes    | WinAnsi    |
| 🔍 | Arial-BoldMT                 | Composite TT | TrueType    | yes    | Identity-H |
| 🔍 | Symbol-Bold                  | Type 1       | Type 1      | yes    | Custom     |
| 🔍 | TimesNewRomanPSMT            | TrueType     | TrueType    | yes    | WinAnsi    |
| 🔍 | TimesNewRomanPSMT            | Composite TT | TrueType    | yes    | Identity-H |
| 🔍 | TimesNewRomanPS-ItalicMT     | TrueType     | TrueType    | yes    | WinAnsi    |
| 🔍 | Symbol                       | Type 1       | Type 1      | yes    | Custom     |
| 🔍 | TimesNewRomanPS-BoldItalicMT | TrueType     | TrueType    | yes    | WinAnsi    |
| 🔍 | Arial-BoldItalicMT           | Composite TT | TrueType    | yes    | Identity-H |



## Image Information

| Type  | Color Space | Size (pixels) | Resolution (dpi) | Bits per channel | Page | Angle (degrees) | Skew | Flipped | Custom Transfer | Custom Halftone | Custom BG | Custom UCR |
|-------|-------------|---------------|------------------|------------------|------|-----------------|------|---------|-----------------|-----------------|-----------|------------|
| Color | CMYK        | 495x322       | 300.3x300.5      | 8                | 1    | 0               | -    | -       | -               | -               | -         | -          |
| Color | Indexed     | 105x424       | 228.6x278.4      | 8                | 1    | 0               | -    | -       | -               | -               | -         | -          |
| Color | Indexed     | 106x380       | 230.7x249.5      | 8                | 1    | 0               | -    | -       | -               | -               | -         | -          |
| Color | CMYK        | 184x184       | 301.2x301.2      | 8                | 1    | 0               | -    | -       | -               | -               | -         | -          |
| Color | CMYK        | 184x184       | 301.2x301.2      | 8                | 1    | 0               | -    | -       | -               | -               | -         | -          |
| Color | CMYK        | 184x184       | 301.2x301.2      | 8                | 1    | 0               | -    | -       | -               | -               | -         | -          |
| Color | CMYK        | 184x184       | 301.2x301.2      | 8                | 1    | 0               | -    | -       | -               | -               | -         | -          |
| Color | CMYK        | 184x184       | 301.2x301.2      | 8                | 1    | 0               | -    | -       | -               | -               | -         | -          |
| Color | CMYK        | 184x184       | 301.2x301.2      | 8                | 1    | 0               | -    | -       | -               | -               | -         | -          |
| Color | CMYK        | 183x184       | 300.3x301.2      | 8                | 1    | 0               | -    | -       | -               | -               | -         | -          |
| Color | CMYK        | 183x184       | 300.3x301.2      | 8                | 1    | 0               | -    | -       | -               | -               | -         | -          |
| Color | CMYK        | 183x183       | 300.3x300.3      | 8                | 1    | 0               | -    | -       | -               | -               | -         | -          |
| Color | CMYK        | 184x183       | 301.2x300.3      | 8                | 1    | 0               | -    | -       | -               | -               | -         | -          |
| Color | Indexed     | 205x205       | 335.6x336.4      | 8                | 1    | 0               | -    | -       | -               | -               | -         | -          |
| Color | Indexed     | 287x86        | 209.3x355.2      | 8                | 1    | 0               | -    | -       | -               | -               | -         | -          |
| Color | Indexed     | 297x64        | 216.3x267.8      | 8                | 1    | 0               | -    | -       | -               | -               | -         | -          |
| Color | Indexed     | 139x61        | 202.2x248.8      | 8                | 1    | 0               | -    | -       | -               | -               | -         | -          |
| Color | Indexed     | 141x54        | 205.6x220.3      | 8                | 1    | 0               | -    | -       | -               | -               | -         | -          |
| Color | CMYK        | 244x321       | 300.2x300        | 8                | 1    | 0               | -    | -       | -               | -               | -         | -          |
| Color | CMYK        | 331x349       | 300.3x300        | 8                | 1    | 0               | -    | -       | -               | -               | -         | -          |
| Color | CMYK        | 184x184       | 301.2x301.2      | 8                | 1    | 0               | -    | -       | -               | -               | -         | -          |
| Color | CMYK        | 184x184       | 301.2x301.2      | 8                | 1    | 0               | -    | -       | -               | -               | -         | -          |
| Color | CMYK        | 184x184       | 301.2x301.2      | 8                | 1    | 0               | -    | -       | -               | -               | -         | -          |
| Color | CMYK        | 184x184       | 301.2x301.2      | 8                | 1    | 0               | -    | -       | -               | -               | -         | -          |
| Color | CMYK        | 184x184       | 301.2x301.2      | 8                | 1    | 0               | -    | -       | -               | -               | -         | -          |
| Color | CMYK        | 184x184       | 301.2x301.2      | 8                | 1    | 0               | -    | -       | -               | -               | -         | -          |
| Color | CMYK        | 184x184       | 301.2x301.2      | 8                | 1    | 0               | -    | -       | -               | -               | -         | -          |
| Color | CMYK        | 185x185       | 301.6x301.6      | 8                | 2    | 0               | -    | -       | -               | -               | -         | -          |
| Color | CMYK        | 185x185       | 301.6x301.6      | 8                | 2    | 0               | -    | -       | -               | -               | -         | -          |
| Color | CMYK        | 185x185       | 301.6x301.6      | 8                | 2    | 0               | -    | -       | -               | -               | -         | -          |
| Color | CMYK        | 185x185       | 301.6x301.6      | 8                | 2    | 0               | -    | -       | -               | -               | -         | -          |
| Color | CMYK        | 333x351       | 300.9x300.5      | 8                | 2    | 0               | -    | -       | -               | -               | -         | -          |
| Color | CMYK        | 245x323       | 300.1x300.6      | 8                | 2    | 0               | -    | -       | -               | -               | -         | -          |
| Color | Indexed     | 141x54        | 204.7x219.4      | 8                | 2    | 0               | -    | -       | -               | -               | -         | -          |
| Color | Indexed     | 139x61        | 201.4x247.8      | 8                | 2    | 0               | -    | -       | -               | -               | -         | -          |
| Color | Indexed     | 297x64        | 215.4x266.6      | 8                | 2    | 0               | -    | -       | -               | -               | -         | -          |
| Color | Indexed     | 287x86        | 208.4x353.8      | 8                | 2    | 0               | -    | -       | -               | -               | -         | -          |
| Color | Indexed     | 205x205       | 334.2x335        | 8                | 2    | 0               | -    | -       | -               | -               | -         | -          |
| Color | CMYK        | 185x184       | 301.6x300.7      | 8                | 2    | 0               | -    | -       | -               | -               | -         | -          |
| Color | CMYK        | 184x185       | 300.7x301.6      | 8                | 2    | 0               | -    | -       | -               | -               | -         | -          |
| Color | CMYK        | 184x185       | 300.7x301.6      | 8                | 2    | 0               | -    | -       | -               | -               | -         | -          |



## Image Information

| Type  | Color Space | Size (pixels) | Resolution (dpi) | Bits per channel | Page | Angle (degrees) | Skew | Flipped | Custom Transfer | Custom Halftone | Custom BG | Custom UCR |
|-------|-------------|---------------|------------------|------------------|------|-----------------|------|---------|-----------------|-----------------|-----------|------------|
| Color | CMYK        | 185x185       | 301.6x301.6      | 8                | 2    | 0               | -    | -       | -               | -               | -         | -          |
| Color | CMYK        | 185x185       | 301.6x301.6      | 8                | 2    | 0               | -    | -       | -               | -               | -         | -          |
| Color | Indexed     | 106x380       | 229.8x248.5      | 8                | 2    | 0               | -    | -       | -               | -               | -         | -          |
| Color | Indexed     | 105x424       | 227.6x277.3      | 8                | 2    | 0               | -    | -       | -               | -               | -         | -          |
| Color | CMYK        | 497x323       | 300.2x300.2      | 8                | 2    | 0               | -    | -       | -               | -               | -         | -          |
| Color | CMYK        | 185x185       | 300.8x300.8      | 8                | 2    | 0               | -    | -       | -               | -               | -         | -          |
| Color | CMYK        | 184x185       | 300x300.8        | 8                | 2    | 0               | -    | -       | -               | -               | -         | -          |
| Color | CMYK        | 184x185       | 300x300.8        | 8                | 2    | 0               | -    | -       | -               | -               | -         | -          |
| Color | CMYK        | 185x184       | 300.8x300        | 8                | 2    | 0               | -    | -       | -               | -               | -         | -          |
| Color | CMYK        | 185x184       | 300.8x300        | 8                | 2    | 0               | -    | -       | -               | -               | -         | -          |
| Color | CMYK        | 184x184       | 300x300          | 8                | 2    | 0               | -    | -       | -               | -               | -         | -          |
| Color | CMYK        | 184x184       | 300x300          | 8                | 2    | 0               | -    | -       | -               | -               | -         | -          |
| Color | CMYK        | 184x184       | 300x300          | 8                | 2    | 0               | -    | -       | -               | -               | -         | -          |
| Color | CMYK        | 184x184       | 300x300          | 8                | 2    | 0               | -    | -       | -               | -               | -         | -          |
| Color | CMYK        | 277x372       | 300.1x300.5      | 8                | 2    | 0               | -    | -       | -               | -               | -         | -          |
| Color | CMYK        | 277x372       | 300.1x300.5      | 8                | 2    | 0               | -    | -       | -               | -               | -         | -          |
| Color | CMYK        | 480x343       | 300.3x300.8      | 8                | 2    | 0               | -    | -       | -               | -               | -         | -          |
| Color | Indexed     | 122x343       | 301.6x300.8      | 8                | 2    | 0               | -    | -       | -               | -               | -         | -          |
| Color | Indexed     | 407x8         | 300.5x312.5      | 8                | 2    | 0               | -    | -       | -               | -               | -         | -          |
| Color | Indexed     | 82x26         | 300.2x307.6      | 8                | 2    | 0               | -    | -       | -               | -               | -         | -          |
| Color | Indexed     | 83x32         | 300.2x300.7      | 8                | 2    | 0               | -    | -       | -               | -               | -         | -          |
| Color | Indexed     | 83x32         | 300.2x305.5      | 8                | 2    | 0               | -    | -       | -               | -               | -         | -          |
| Color | Indexed     | 171x67        | 247.5x272.1      | 8                | 2    | 0               | -    | -       | -               | -               | -         | -          |
| Color | Indexed     | 172x59        | 249x239.6        | 8                | 2    | 0               | -    | -       | -               | -               | -         | -          |
| Color | CMYK        | 493x343       | 300.2x300.8      | 8                | 2    | 0               | -    | -       | -               | -               | -         | -          |
| Color | CMYK        | 124x343       | 300.3x300.8      | 8                | 2    | 0               | -    | -       | -               | -               | -         | -          |
| Color | CMYK        | 250x401       | 301x300.2        | 8                | 2    | 0               | -    | -       | -               | -               | -         | -          |
| Color | CMYK        | 246x323       | 301.1x300.1      | 8                | 2    | 0               | -    | -       | -               | -               | -         | -          |
| Color | CMYK        | 243x320       | 300.5x300.4      | 8                | 3    | 0               | -    | -       | -               | -               | -         | -          |
| Color | CMYK        | 275x368       | 301x300.3        | 8                | 3    | 0               | -    | -       | -               | -               | -         | -          |
| Color | CMYK        | 275x368       | 301x300.3        | 8                | 3    | 0               | -    | -       | -               | -               | -         | -          |
| Color | CMYK        | 475x339       | 300.3x300.4      | 8                | 3    | 0               | -    | -       | -               | -               | -         | -          |
| Color | Indexed     | 121x339       | 302.2x300.4      | 8                | 3    | 0               | -    | -       | -               | -               | -         | -          |
| Color | Indexed     | 403x8         | 300.7x315.8      | 8                | 3    | 0               | -    | -       | -               | -               | -         | -          |
| Color | Indexed     | 82x26         | 303.3x310.8      | 8                | 3    | 0               | -    | -       | -               | -               | -         | -          |
| Color | Indexed     | 83x32         | 303.3x303.8      | 8                | 3    | 0               | -    | -       | -               | -               | -         | -          |
| Color | Indexed     | 83x32         | 303.3x308.7      | 8                | 3    | 0               | -    | -       | -               | -               | -         | -          |
| Color | Indexed     | 171x67        | 250.1x275        | 8                | 3    | 0               | -    | -       | -               | -               | -         | -          |
| Color | Indexed     | 172x59        | 251.6x242.1      | 8                | 3    | 0               | -    | -       | -               | -               | -         | -          |
| Color | CMYK        | 488x339       | 300.2x300.4      | 8                | 3    | 0               | -    | -       | -               | -               | -         | -          |
| Color | CMYK        | 123x339       | 301x300.4        | 8                | 3    | 0               | -    | -       | -               | -               | -         | -          |



## Image Information

| Type  | Color Space | Size (pixels) | Resolution (dpi) | Bits per channel | Page | Angle (degrees) | Skew | Flipped | Custom Transfer | Custom Halftone | Custom BG | Custom UCR |
|-------|-------------|---------------|------------------|------------------|------|-----------------|------|---------|-----------------|-----------------|-----------|------------|
| Color | CMYK        | 247x397       | 300.5x300.3      | 8                | 3    | 0               | -    | -       | -               | -               | -         | -          |
| Color | CMYK        | 183x183       | 300.7x301.5      | 8                | 3    | 0               | -    | -       | -               | -               | -         | -          |
| Color | CMYK        | 183x183       | 300.7x301.5      | 8                | 3    | 0               | -    | -       | -               | -               | -         | -          |
| Color | CMYK        | 183x183       | 301.5x300.7      | 8                | 3    | 0               | -    | -       | -               | -               | -         | -          |
| Color | CMYK        | 183x183       | 301.5x300.7      | 8                | 3    | 0               | -    | -       | -               | -               | -         | -          |
| Color | CMYK        | 272x364       | 301x300.7        | 8                | 3    | 0               | -    | -       | -               | -               | -         | -          |
| Color | Indexed     | 171x76        | 232.5x290.1      | 8                | 3    | 0               | -    | -       | -               | -               | -         | -          |
| Color | Indexed     | 182x67        | 247.5x255.7      | 8                | 3    | 0               | -    | -       | -               | -               | -         | -          |
| Color | CMYK        | 669x389       | 300.2x300.3      | 8                | 4    | 0               | -    | -       | -               | -               | -         | -          |
| Color | CMYK        | 400x422       | 300.3x300.3      | 8                | 4    | 0               | -    | -       | -               | -               | -         | -          |
| Color | CMYK        | 389x389       | 300.3x300.3      | 8                | 4    | 0               | -    | -       | -               | -               | -         | -          |
| Color | CMYK        | 400x422       | 300.3x300.3      | 8                | 4    | 0               | -    | -       | -               | -               | -         | -          |
| Color | Indexed     | 197x88        | 178x296.3        | 8                | 4    | 0               | -    | -       | -               | -               | -         | -          |
| Color | Indexed     | 198x63        | 178.9x213.3      | 8                | 4    | 0               | -    | -       | -               | -               | -         | -          |
| Color | Indexed     | 94x47         | 186.6x174.9      | 8                | 5    | 0               | -    | -       | -               | -               | -         | -          |
| Color | Indexed     | 93x55         | 186.5x207.3      | 8                | 5    | 0               | -    | -       | -               | -               | -         | -          |
| Color | Indexed     | 109x53        | 216.4x201        | 8                | 5    | 0               | -    | -       | -               | -               | -         | -          |
| Color | Indexed     | 109x53        | 218.6x196.1      | 8                | 5    | 0               | -    | -       | -               | -               | -         | -          |
| Color | Indexed     | 101x71        | 200.5x264.3      | 8                | 5    | 0               | -    | -       | -               | -               | -         | -          |
| Color | Indexed     | 92x51         | 182.7x188.7      | 8                | 5    | 0               | -    | -       | -               | -               | -         | -          |
| Color | Indexed     | 111x53        | 220.4x202.3      | 8                | 5    | 0               | -    | -       | -               | -               | -         | -          |
| Color | Indexed     | 98x48         | 194.6x177.6      | 8                | 5    | 0               | -    | -       | -               | -               | -         | -          |
| Color | CMYK        | 354x353       | 300.8x300.3      | 8                | 5    | 0               | -    | -       | -               | -               | -         | -          |
| Color | Indexed     | 199x46        | 197.9x170.2      | 8                | 5    | 0               | -    | -       | -               | -               | -         | -          |
| Color | Indexed     | 200x58        | 198.9x214.5      | 8                | 5    | 0               | -    | -       | -               | -               | -         | -          |
| Color | CMYK        | 554x354       | 300.5x300.8      | 8                | 5    | 0               | -    | -       | -               | -               | -         | -          |
| Color | CMYK        | 554x353       | 300.5x300.3      | 8                | 5    | 0               | -    | -       | -               | -               | -         | -          |
| Color | CMYK        | 186x354       | 301.5x300.8      | 8                | 5    | 0               | -    | -       | -               | -               | -         | -          |
| Color | CMYK        | 186x353       | 301.5x300.3      | 8                | 5    | 0               | -    | -       | -               | -               | -         | -          |
| Color | CMYK        | 193x365       | 301.4x300.7      | 8                | 6    | 0               | -    | -       | -               | -               | -         | -          |
| Color | CMYK        | 193x365       | 301.4x300.7      | 8                | 6    | 0               | -    | -       | -               | -               | -         | -          |
| Color | CMYK        | 193x365       | 301.4x300.7      | 8                | 6    | 0               | -    | -       | -               | -               | -         | -          |
| Color | CMYK        | 193x365       | 301.4x300.7      | 8                | 6    | 0               | -    | -       | -               | -               | -         | -          |
| Color | CMYK        | 192x365       | 300.6x300.7      | 8                | 6    | 0               | -    | -       | -               | -               | -         | -          |
| Color | CMYK        | 192x365       | 300.6x300.7      | 8                | 6    | 0               | -    | -       | -               | -               | -         | -          |
| Color | CMYK        | 193x365       | 301.4x300.7      | 8                | 6    | 0               | -    | -       | -               | -               | -         | -          |
| Color | CMYK        | 193x365       | 301.4x300.7      | 8                | 6    | 0               | -    | -       | -               | -               | -         | -          |
| Color | CMYK        | 185x358       | 301.5x300.3      | 8                | 6    | 0               | -    | -       | -               | -               | -         | -          |
| Color | CMYK        | 185x358       | 301.5x300.3      | 8                | 6    | 0               | -    | -       | -               | -               | -         | -          |
| Color | CMYK        | 185x358       | 300.7x300.3      | 8                | 6    | 0               | -    | -       | -               | -               | -         | -          |
| Color | CMYK        | 186x358       | 301.5x300.3      | 8                | 6    | 0               | -    | -       | -               | -               | -         | -          |

Report for Supplementary.pdf

Preflighted on February 5, 2015 by Enfocus PitStop Server 09, update 3

powered by Enfocus PitStop Library 09, update 3

Report generated by Enfocus PitStop Library 09, update 3



## Image Information

| Type  | Color Space | Size (pixels) | Resolution (dpi) | Bits per channel | Page | Angle (degrees) | Skew | Flipped | Custom Transfer | Custom Halftone | Custom BG | Custom UCR |
|-------|-------------|---------------|------------------|------------------|------|-----------------|------|---------|-----------------|-----------------|-----------|------------|
| Color | CMYK        | 185x358       | 300.7x300.3      | 8                | 6    | 0               | -    | -       | -               | -               | -         | -          |
| Color | CMYK        | 185x358       | 300.7x300.3      | 8                | 6    | 0               | -    | -       | -               | -               | -         | -          |
| Color | CMYK        | 187x360       | 301.5x300.3      | 8                | 7    | 0               | -    | -       | -               | -               | -         | -          |
| Color | CMYK        | 187x360       | 301.5x300.3      | 8                | 7    | 0               | -    | -       | -               | -               | -         | -          |
| Color | CMYK        | 187x360       | 301.5x300.3      | 8                | 7    | 0               | -    | -       | -               | -               | -         | -          |
| Color | CMYK        | 194x391       | 301.4x300.3      | 8                | 7    | 0               | -    | -       | -               | -               | -         | -          |
| Color | CMYK        | 194x391       | 301.4x300.3      | 8                | 7    | 0               | -    | -       | -               | -               | -         | -          |
| Color | Indexed     | 163x7         | 301.7x318.2      | 8                | 7    | 0               | -    | -       | -               | -               | -         | -          |
| Color | CMYK        | 194x391       | 301.4x300.3      | 8                | 7    | 0               | -    | -       | -               | -               | -         | -          |
| Color | Indexed     | 103x11        | 302.6x311.3      | 8                | 7    | 0               | -    | -       | -               | -               | -         | -          |
| Color | CMYK        | 187x361       | 301.5x300.7      | 8                | 7    | 0               | -    | -       | -               | -               | -         | -          |
| Color | CMYK        | 187x361       | 301.5x300.7      | 8                | 7    | 0               | -    | -       | -               | -               | -         | -          |
| Color | CMYK        | 187x360       | 301.5x300.3      | 8                | 7    | 0               | -    | -       | -               | -               | -         | -          |
| Color | CMYK        | 194x391       | 301.4x300.3      | 8                | 7    | 0               | -    | -       | -               | -               | -         | -          |
| Color | CMYK        | 194x391       | 301.4x300.3      | 8                | 7    | 0               | -    | -       | -               | -               | -         | -          |
| Color | CMYK        | 194x391       | 301.4x300.3      | 8                | 7    | 0               | -    | -       | -               | -               | -         | -          |
| Color | CMYK        | 366x386       | 300.7x300.7      | 8                | 8    | 0               | -    | -       | -               | -               | -         | -          |
| Color | Indexed     | 134x6         | 302x321.4        | 8                | 8    | 0               | -    | -       | -               | -               | -         | -          |
| Color | Indexed     | 29x15         | 309.6x319.2      | 8                | 8    | 0               | -    | -       | -               | -               | -         | -          |
| Color | Indexed     | 147x28        | 300.8x304.3      | 8                | 8    | 0               | -    | -       | -               | -               | -         | -          |
| Color | Indexed     | 147x35        | 300.8x303.5      | 8                | 8    | 0               | -    | -       | -               | -               | -         | -          |
| Color | Indexed     | 90x29         | 301.3x309.6      | 8                | 8    | 0               | -    | -       | -               | -               | -         | -          |
| Color | Indexed     | 147x35        | 300.8x303.5      | 8                | 8    | 0               | -    | -       | -               | -               | -         | -          |
| Color | Indexed     | 134x392       | 302x300.3        | 8                | 8    | 0               | -    | -       | -               | -               | -         | -          |
| Color | CMYK        | 659x392       | 300.2x300.3      | 8                | 8    | 0               | -    | -       | -               | -               | -         | -          |
| Color | CMYK        | 357x356       | 300.8x300.8      | 8                | 8    | 0               | -    | -       | -               | -               | -         | -          |
| Color | CMYK        | 366x386       | 300.7x300.3      | 8                | 8    | 0               | -    | -       | -               | -               | -         | -          |
| Color | CMYK        | 200x397       | 301.4x300.3      | 8                | 9    | 0               | -    | -       | -               | -               | -         | -          |
| Color | Indexed     | 94x9          | 301.3x314        | 8                | 9    | 0               | -    | -       | -               | -               | -         | -          |
| Color | CMYK        | 205x387       | 301.3x300.3      | 8                | 9    | 0               | -    | -       | -               | -               | -         | -          |
| Color | CMYK        | 192x387       | 301.4x300.3      | 8                | 9    | 0               | -    | -       | -               | -               | -         | -          |
| Color | CMYK        | 192x387       | 301.4x300.3      | 8                | 9    | 0               | -    | -       | -               | -               | -         | -          |
| Color | CMYK        | 357x357       | 300.8x300.3      | 8                | 9    | 0               | -    | -       | -               | -               | -         | -          |
| Color | Indexed     | 153x82        | 300.8x301.5      | 8                | 9    | 0               | -    | -       | -               | -               | -         | -          |
| Color | Indexed     | 216x110       | 424.6x401.9      | 8                | 9    | 0               | -    | -       | -               | -               | -         | -          |
| Color | Indexed     | 178x80        | 349.9x292.3      | 8                | 9    | 0               | -    | -       | -               | -               | -         | -          |
| Color | Indexed     | 153x82        | 300.8x301.5      | 8                | 9    | 0               | -    | -       | -               | -               | -         | -          |
| Color | CMYK        | 182x367       | 301.5x300.3      | 8                | 10   | 0               | -    | -       | -               | -               | -         | -          |
| Color | CMYK        | 636x367       | 300.2x300.3      | 8                | 10   | 0               | -    | -       | -               | -               | -         | -          |
| Color | Indexed     | 57x27         | 302.1x304.5      | 8                | 10   | 0               | -    | -       | -               | -               | -         | -          |
| Color | Indexed     | 72x26         | 301.7x304.7      | 8                | 10   | 0               | -    | -       | -               | -               | -         | -          |





## Image Information

| Type  | Color Space | Size (pixels) | Resolution (dpi) | Bits per channel | Page | Angle (degrees) | Skew | Flipped | Custom Transfer | Custom Halftone | Custom BG | Custom UCR |
|-------|-------------|---------------|------------------|------------------|------|-----------------|------|---------|-----------------|-----------------|-----------|------------|
| Color | Indexed     | 391x7         | 300.3x318.2      | 8                | 10   | 0               | -    | -       | -               | -               | -         | -          |
| Color | CMYK        | 182x367       | 301.5x300.7      | 8                | 10   | 0               | -    | -       | -               | -               | -         | -          |
| Color | CMYK        | 617x367       | 300.4x300.3      | 8                | 10   | 0               | -    | -       | -               | -               | -         | -          |
| Color | CMYK        | 182x367       | 300.7x300.7      | 8                | 10   | 0               | -    | -       | -               | -               | -         | -          |
| Color | Indexed     | 361x3         | 596.4x428.6      | 8                | 10   | 0               | -    | -       | -               | -               | -         | -          |
| Color | CMYK        | 274x367       | 301x300.3        | 8                | 10   | 0               | -    | -       | -               | -               | -         | -          |
| Color | CMYK        | 284x405       | 301x300.3        | 8                | 10   | 0               | -    | -       | -               | -               | -         | -          |
| Color | CMYK        | 198x405       | 301.4x300.3      | 8                | 10   | 0               | -    | -       | -               | -               | -         | -          |
| Color | Indexed     | 119x79        | 248.5x305.3      | 8                | 11   | 0               | -    | -       | -               | -               | -         | -          |
| Color | Indexed     | 117x57        | 242.7x221.6      | 8                | 11   | 0               | -    | -       | -               | -               | -         | -          |
| Color | Indexed     | 77x51         | 159.7x199.5      | 8                | 11   | 0               | -    | -       | -               | -               | -         | -          |
| Color | Indexed     | 107x54        | 222.7x211.3      | 8                | 11   | 0               | -    | -       | -               | -               | -         | -          |
| Color | Indexed     | 104x53        | 215.7x204.8      | 8                | 11   | 0               | -    | -       | -               | -               | -         | -          |
| Color | CMYK        | 175x338       | 301.2x300.4      | 8                | 11   | 0               | -    | -       | -               | -               | -         | -          |
| Color | CMYK        | 175x338       | 301.2x300.4      | 8                | 11   | 0               | -    | -       | -               | -               | -         | -          |
| Color | CMYK        | 175x338       | 301.2x300.4      | 8                | 11   | 0               | -    | -       | -               | -               | -         | -          |
| Color | CMYK        | 175x339       | 300.4x300.9      | 8                | 11   | 0               | -    | -       | -               | -               | -         | -          |
| Color | CMYK        | 142x78        | 300.5x303.3      | 8                | 11   | 0               | -    | -       | -               | -               | -         | -          |
| Color | CMYK        | 145x78        | 300.7x303.3      | 8                | 11   | 0               | -    | -       | -               | -               | -         | -          |
| Color | Indexed     | 99x46         | 206.7x182.3      | 8                | 11   | 0               | -    | -       | -               | -               | -         | -          |
| Color | Indexed     | 93x49         | 192.9x194.1      | 8                | 11   | 0               | -    | -       | -               | -               | -         | -          |
| Color | Indexed     | 99x57         | 205.3x224.4      | 8                | 11   | 0               | -    | -       | -               | -               | -         | -          |
| Color | CMYK        | 80x180        | 305.4x280.5      | 8                | 11   | 0               | -    | -       | -               | -               | -         | -          |
| Color | CMYK        | 80x180        | 305.4x280.5      | 8                | 11   | 0               | -    | -       | -               | -               | -         | -          |
| Color | CMYK        | 80x180        | 305.4x279.8      | 8                | 11   | 0               | -    | -       | -               | -               | -         | -          |
| Color | CMYK        | 80x180        | 305.4x279.8      | 8                | 11   | 0               | -    | -       | -               | -               | -         | -          |
| Color | CMYK        | 80x180        | 305.4x279.8      | 8                | 11   | 0               | -    | -       | -               | -               | -         | -          |
| Color | CMYK        | 80x180        | 305.4x279.8      | 8                | 11   | 0               | -    | -       | -               | -               | -         | -          |
| Color | CMYK        | 80x180        | 305.4x279.8      | 8                | 11   | 0               | -    | -       | -               | -               | -         | -          |
| Color | CMYK        | 80x180        | 305.4x279.8      | 8                | 11   | 0               | -    | -       | -               | -               | -         | -          |
| Color | CMYK        | 80x180        | 305.4x279.8      | 8                | 11   | 0               | -    | -       | -               | -               | -         | -          |
| Color | CMYK        | 80x180        | 305.4x279.8      | 8                | 11   | 0               | -    | -       | -               | -               | -         | -          |
| Color | CMYK        | 80x180        | 305.4x280.5      | 8                | 11   | 0               | -    | -       | -               | -               | -         | -          |
| Color | CMYK        | 80x180        | 305.4x280.5      | 8                | 11   | 0               | -    | -       | -               | -               | -         | -          |
| Color | CMYK        | 80x180        | 305.4x280.5      | 8                | 11   | 0               | -    | -       | -               | -               | -         | -          |
| Color | CMYK        | 80x180        | 305.4x280.5      | 8                | 11   | 0               | -    | -       | -               | -               | -         | -          |
| Color | CMYK        | 80x180        | 305.4x280.5      | 8                | 11   | 0               | -    | -       | -               | -               | -         | -          |
| Color | CMYK        | 80x180        | 305.4x280.5      | 8                | 11   | 0               | -    | -       | -               | -               | -         | -          |
| Color | CMYK        | 80x180        | 305.4x280.5      | 8                | 11   | 0               | -    | -       | -               | -               | -         | -          |
| Color | CMYK        | 60x60         | 229x229          | 8                | 11   | 0               | -    | -       | -               | -               | -         | -          |
| Color | CMYK        | 60x60         | 229x229          | 8                | 11   | 0               | -    | -       | -               | -               | -         | -          |
| Color | CMYK        | 60x60         | 229x229          | 8                | 11   | 0               | -    | -       | -               | -               | -         | -          |
| Color | CMYK        | 60x60         | 229x229          | 8                | 11   | 0               | -    | -       | -               | -               | -         | -          |



## Image Information

| Type  | Color Space | Size (pixels) | Resolution (dpi) | Bits per channel | Page | Angle (degrees) | Skew | Flipped | Custom Transfer | Custom Halftone | Custom BG | Custom UCR |
|-------|-------------|---------------|------------------|------------------|------|-----------------|------|---------|-----------------|-----------------|-----------|------------|
| Color | CMYK        | 60x60         | 229x229          | 8                | 11   | 0               | -    | -       | -               | -               | -         | -          |
| Color | CMYK        | 60x60         | 229x229          | 8                | 11   | 0               | -    | -       | -               | -               | -         | -          |
| Color | CMYK        | 60x60         | 229x229          | 8                | 11   | 0               | -    | -       | -               | -               | -         | -          |
| Color | CMYK        | 60x60         | 229x229          | 8                | 11   | 0               | -    | -       | -               | -               | -         | -          |
| Color | CMYK        | 60x60         | 229x229          | 8                | 11   | 0               | -    | -       | -               | -               | -         | -          |
| Color | CMYK        | 60x60         | 229x229          | 8                | 11   | 0               | -    | -       | -               | -               | -         | -          |
| Color | CMYK        | 60x60         | 229x229          | 8                | 11   | 0               | -    | -       | -               | -               | -         | -          |
| Color | CMYK        | 60x60         | 229x229          | 8                | 11   | 0               | -    | -       | -               | -               | -         | -          |
| Color | CMYK        | 60x60         | 229x229          | 8                | 11   | 0               | -    | -       | -               | -               | -         | -          |
| Color | CMYK        | 193x193       | 300x300.8        | 8                | 11   | 0               | -    | -       | -               | -               | -         | -          |
| Color | CMYK        | 284x284       | 441.5x441.5      | 8                | 11   | 0               | -    | -       | -               | -               | -         | -          |
| Color | CMYK        | 284x284       | 441.5x442.6      | 8                | 11   | 0               | -    | -       | -               | -               | -         | -          |
| Color | CMYK        | 284x284       | 442.6x441.5      | 8                | 11   | 0               | -    | -       | -               | -               | -         | -          |
| Color | CMYK        | 284x284       | 442.6x442.6      | 8                | 11   | 0               | -    | -       | -               | -               | -         | -          |
| Color | CMYK        | 193x193       | 300x300.8        | 8                | 11   | 0               | -    | -       | -               | -               | -         | -          |
| Color | CMYK        | 60x60         | 229x229          | 8                | 11   | 0               | -    | -       | -               | -               | -         | -          |
| Color | CMYK        | 60x60         | 229x229          | 8                | 11   | 0               | -    | -       | -               | -               | -         | -          |
| Color | CMYK        | 60x60         | 229x229          | 8                | 11   | 0               | -    | -       | -               | -               | -         | -          |
| Color | CMYK        | 60x60         | 229x229          | 8                | 11   | 0               | -    | -       | -               | -               | -         | -          |
| Color | CMYK        | 60x60         | 229x229          | 8                | 11   | 0               | -    | -       | -               | -               | -         | -          |
| Color | CMYK        | 80x180        | 305.4x280.5      | 8                | 11   | 0               | -    | -       | -               | -               | -         | -          |
| Color | CMYK        | 80x180        | 307.3x280.5      | 8                | 11   | 0               | -    | -       | -               | -               | -         | -          |
| Color | CMYK        | 80x180        | 305.4x280.5      | 8                | 11   | 0               | -    | -       | -               | -               | -         | -          |
| Color | CMYK        | 80x190        | 305.4x295.4      | 8                | 11   | 0               | -    | -       | -               | -               | -         | -          |
| Color | CMYK        | 80x190        | 305.4x295.4      | 8                | 11   | 0               | -    | -       | -               | -               | -         | -          |
| Color | CMYK        | 60x60         | 229x229          | 8                | 11   | 0               | -    | -       | -               | -               | -         | -          |
| Color | CMYK        | 80x80         | 305.4x305.4      | 8                | 11   | 0               | -    | -       | -               | -               | -         | -          |
| Color | CMYK        | 205x205       | 305.8x305.8      | 8                | 12   | 0               | -    | -       | -               | -               | -         | -          |
| Color | Indexed     | 205x205       | 306.6x305.8      | 8                | 12   | 0               | -    | -       | -               | -               | -         | -          |
| Color | CMYK        | 205x205       | 306.6x305.8      | 8                | 12   | 0               | -    | -       | -               | -               | -         | -          |
| Color | CMYK        | 205x205       | 305.8x305.8      | 8                | 12   | 0               | -    | -       | -               | -               | -         | -          |
| Color | Indexed     | 205x205       | 306.6x305.8      | 8                | 12   | 0               | -    | -       | -               | -               | -         | -          |
| Color | Indexed     | 205x205       | 306.6x305.8      | 8                | 12   | 0               | -    | -       | -               | -               | -         | -          |
| Color | CMYK        | 202x201       | 301.3x300.6      | 8                | 12   | 0               | -    | -       | -               | -               | -         | -          |
| Color | CMYK        | 202x201       | 301.3x300.6      | 8                | 12   | 0               | -    | -       | -               | -               | -         | -          |
| Color | CMYK        | 201x201       | 300.6x300.6      | 8                | 12   | 0               | -    | -       | -               | -               | -         | -          |
| Color | CMYK        | 201x201       | 300.6x300.6      | 8                | 12   | 0               | -    | -       | -               | -               | -         | -          |
| Color | CMYK        | 284x284       | 424.7x424.7      | 8                | 12   | 0               | -    | -       | -               | -               | -         | -          |
| Color | CMYK        | 284x284       | 424.7x424.7      | 8                | 12   | 0               | -    | -       | -               | -               | -         | -          |
| Color | CMYK        | 189x383       | 300.6x300.7      | 8                | 12   | 0               | -    | -       | -               | -               | -         | -          |
| Color | CMYK        | 189x383       | 300.6x300.7      | 8                | 12   | 0               | -    | -       | -               | -               | -         | -          |



## Image Information

| Type  | Color Space | Size (pixels) | Resolution (dpi) | Bits per channel | Page | Angle (degrees) | Skew | Flipped | Custom Transfer | Custom Halftone | Custom BG | Custom UCR |
|-------|-------------|---------------|------------------|------------------|------|-----------------|------|---------|-----------------|-----------------|-----------|------------|
| Color | Indexed     | 88x42         | 177.1x157.3      | 8                | 12   | 0               | -    | -       | -               | -               | -         | -          |
| Color | Indexed     | 102x44        | 203.2x163.8      | 8                | 12   | 0               | -    | -       | -               | -               | -         | -          |
| Color | Indexed     | 108x41        | 215.1x152.6      | 8                | 12   | 0               | -    | -       | -               | -               | -         | -          |
| Color | Indexed     | 98x31         | 195.2x115.4      | 8                | 12   | 0               | -    | -       | -               | -               | -         | -          |
| Color | CMYK        | 151x81        | 300.8x301.5      | 8                | 12   | 0               | -    | -       | -               | -               | -         | -          |
| Color | CMYK        | 189x383       | 300.6x300.7      | 8                | 12   | 0               | -    | -       | -               | -               | -         | -          |
| Color | CMYK        | 67x67         | 211.4x211.4      | 8                | 13   | 0               | -    | -       | -               | -               | -         | -          |
| Color | CMYK        | 251x252       | 318.3x319.5      | 8                | 13   | 0               | -    | -       | -               | -               | -         | -          |
| Color | CMYK        | 252x252       | 318.9x318.9      | 8                | 13   | 0               | -    | -       | -               | -               | -         | -          |
| Color | CMYK        | 252x252       | 319.5x319.5      | 8                | 13   | 0               | -    | -       | -               | -               | -         | -          |
| Color | CMYK        | 267x260       | 337.8x329.7      | 8                | 13   | 0               | -    | -       | -               | -               | -         | -          |
| Color | CMYK        | 72x72         | 227.1x227.1      | 8                | 13   | 0               | -    | -       | -               | -               | -         | -          |
| Color | CMYK        | 72x72         | 227.1x227.1      | 8                | 13   | 0               | -    | -       | -               | -               | -         | -          |
| Color | CMYK        | 67x67         | 211.4x211.4      | 8                | 13   | 0               | -    | -       | -               | -               | -         | -          |
| Color | CMYK        | 67x67         | 212.5x211.4      | 8                | 13   | 0               | -    | -       | -               | -               | -         | -          |
| Color | CMYK        | 67x67         | 211.4x211.4      | 8                | 13   | 0               | -    | -       | -               | -               | -         | -          |
| Color | CMYK        | 67x67         | 211.4x211.4      | 8                | 13   | 0               | -    | -       | -               | -               | -         | -          |
| Color | CMYK        | 67x67         | 211.4x211.4      | 8                | 13   | 0               | -    | -       | -               | -               | -         | -          |
| Color | CMYK        | 252x252       | 318.9x319.5      | 8                | 13   | 0               | -    | -       | -               | -               | -         | -          |
| Color | CMYK        | 252x252       | 319.5x319.5      | 8                | 13   | 0               | -    | -       | -               | -               | -         | -          |
| Color | CMYK        | 252x252       | 319.5x319.5      | 8                | 13   | 0               | -    | -       | -               | -               | -         | -          |
| Color | CMYK        | 267x260       | 337.8x329.7      | 8                | 13   | 0               | -    | -       | -               | -               | -         | -          |
| Color | CMYK        | 72x72         | 228.3x227.1      | 8                | 13   | 0               | -    | -       | -               | -               | -         | -          |
| Color | CMYK        | 267x260       | 337.8x329.7      | 8                | 13   | 0               | -    | -       | -               | -               | -         | -          |
| Color | CMYK        | 72x72         | 227.1x227.1      | 8                | 13   | 0               | -    | -       | -               | -               | -         | -          |
| Color | CMYK        | 72x72         | 227.1x227.1      | 8                | 13   | 0               | -    | -       | -               | -               | -         | -          |
| Color | CMYK        | 72x72         | 227.1x227.1      | 8                | 13   | 0               | -    | -       | -               | -               | -         | -          |
| Color | CMYK        | 72x72         | 227.1x227.1      | 8                | 13   | 0               | -    | -       | -               | -               | -         | -          |
| Color | CMYK        | 72x72         | 227.1x227.1      | 8                | 13   | 0               | -    | -       | -               | -               | -         | -          |
| Color | CMYK        | 267x260       | 337.8x329.7      | 8                | 13   | 0               | -    | -       | -               | -               | -         | -          |
| Color | CMYK        | 72x72         | 227.1x227.1      | 8                | 13   | 0               | -    | -       | -               | -               | -         | -          |
| Color | CMYK        | 72x72         | 227.1x227.1      | 8                | 13   | 0               | -    | -       | -               | -               | -         | -          |
| Color | CMYK        | 72x72         | 227.1x227.1      | 8                | 13   | 0               | -    | -       | -               | -               | -         | -          |
| Color | CMYK        | 72x72         | 227.1x227.1      | 8                | 13   | 0               | -    | -       | -               | -               | -         | -          |
| Color | CMYK        | 267x260       | 338.5x329.7      | 8                | 13   | 0               | -    | -       | -               | -               | -         | -          |
| Color | CMYK        | 267x260       | 337.8x329        | 8                | 13   | 0               | -    | -       | -               | -               | -         | -          |
| Color | CMYK        | 267x260       | 337.8x329        | 8                | 13   | 0               | -    | -       | -               | -               | -         | -          |
| Color | CMYK        | 267x260       | 337.8x329        | 8                | 13   | 0               | -    | -       | -               | -               | -         | -          |
| Color | CMYK        | 267x260       | 337.8x329        | 8                | 13   | 0               | -    | -       | -               | -               | -         | -          |
| Color | CMYK        | 267x260       | 338.5x329        | 8                | 13   | 0               | -    | -       | -               | -               | -         | -          |
| Color | CMYK        | 67x67         | 211.4x211.4      | 8                | 13   | 0               | -    | -       | -               | -               | -         | -          |

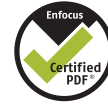

## Image Information

| Type  | Color Space | Size (pixels) | Resolution (dpi) | Bits per channel | Page | Angle (degrees) | Skew | Flipped | Custom Transfer | Custom Halftone | Custom BG | Custom UCR |
|-------|-------------|---------------|------------------|------------------|------|-----------------|------|---------|-----------------|-----------------|-----------|------------|
| Color | CMYK        | 67x67         | 211.4x211.4      | 8                | 13   | 0               | -    | -       | -               | -               | -         | -          |
| Color | CMYK        | 67x67         | 211.4x211.4      | 8                | 13   | 0               | -    | -       | -               | -               | -         | -          |
| Color | CMYK        | 67x67         | 211.4x211.4      | 8                | 13   | 0               | -    | -       | -               | -               | -         | -          |
| Color | CMYK        | 67x67         | 211.4x211.4      | 8                | 13   | 0               | -    | -       | -               | -               | -         | -          |
| Color | CMYK        | 67x67         | 211.4x211.4      | 8                | 13   | 0               | -    | -       | -               | -               | -         | -          |
| Color | CMYK        | 242x252       | 306.8x319.5      | 8                | 13   | 0               | -    | -       | -               | -               | -         | -          |
| Color | CMYK        | 252x252       | 318.9x319.5      | 8                | 13   | 0               | -    | -       | -               | -               | -         | -          |
| Color | CMYK        | 252x252       | 319.5x319.5      | 8                | 13   | 0               | -    | -       | -               | -               | -         | -          |
| Color | CMYK        | 250x252       | 317x318.9        | 8                | 13   | 0               | -    | -       | -               | -               | -         | -          |
| Color | CMYK        | 250x252       | 316.3x318.9      | 8                | 13   | 0               | -    | -       | -               | -               | -         | -          |
| Color | CMYK        | 250x252       | 317x318.9        | 8                | 13   | 0               | -    | -       | -               | -               | -         | -          |
| Color | CMYK        | 267x260       | 338.5x329        | 8                | 13   | 0               | -    | -       | -               | -               | -         | -          |
| Color | CMYK        | 267x260       | 337.8x329        | 8                | 13   | 0               | -    | -       | -               | -               | -         | -          |

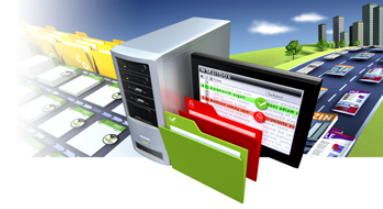

## OPI Information

---

No OPI

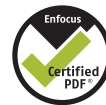

## Color Information

| Item        | Value    |
|-------------|----------|
| Color Space | Indexed  |
| Page        | 1-2      |
| Base Space  | CMYK     |
| Range       | 233      |
| Color Space | Indexed  |
| Page        | 1-2      |
| Base Space  | CMYK     |
| Range       | 254      |
| Color Space | Indexed  |
| Page        | 1-2      |
| Base Space  | CMYK     |
| Range       | 226      |
| Color Space | Indexed  |
| Page        | 1-2      |
| Base Space  | CMYK     |
| Range       | 250      |
| Color Space | Indexed  |
| Page        | 1-2      |
| Base Space  | CMYK     |
| Range       | 253      |
| Color Space | CMYK     |
| Page        | 1-15     |
| Color Space | Indexed  |
| Page        | 1-2      |
| Base Space  | CMYK     |
| Range       | 203      |
| Color Space | Indexed  |
| Page        | 1-2      |
| Base Space  | CMYK     |
| Range       | 221      |
| Color Space | Indexed  |
| Page        | 2-4      |
| Base Space  | CMYK     |
| Range       | 255      |
| Color Space | Indexed  |
| Page        | 2-3,7-10 |

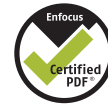

## Color Information

| Item               | Value          |
|--------------------|----------------|
| Base Space Range   | CMYK<br>0      |
| 🔍 Color Space Page | Indexed<br>2   |
| Base Space Range   | CMYK<br>219    |
| 🔍 Color Space Page | Indexed<br>2-3 |
| Base Space Range   | CMYK<br>156    |
| 🔍 Color Space Page | Indexed<br>3   |
| Base Space Range   | CMYK<br>253    |
| 🔍 Color Space Page | Indexed<br>3   |
| Base Space Range   | CMYK<br>248    |
| 🔍 Color Space Page | Indexed<br>3   |
| Base Space Range   | CMYK<br>226    |
| 🔍 Color Space Page | Indexed<br>4   |
| Base Space Range   | CMYK<br>247    |
| 🔍 Color Space Page | Indexed<br>5   |
| Base Space Range   | CMYK<br>121    |
| 🔍 Color Space Page | Indexed<br>5   |
| Base Space Range   | CMYK<br>254    |
| 🔍 Color Space Page | Indexed<br>5   |



## Color Information

| Item               | Value        |
|--------------------|--------------|
| Base Space Range   | CMYK<br>216  |
| 🔍 Color Space Page | Indexed<br>5 |
| Base Space Range   | CMYK<br>208  |
| 🔍 Color Space Page | Indexed<br>5 |
| Base Space Range   | CMYK<br>231  |
| 🔍 Color Space Page | Indexed<br>5 |
| Base Space Range   | CMYK<br>190  |
| 🔍 Color Space Page | Indexed<br>5 |
| Base Space Range   | CMYK<br>221  |
| 🔍 Color Space Page | Indexed<br>5 |
| Base Space Range   | CMYK<br>223  |
| 🔍 Color Space Page | Indexed<br>5 |
| Base Space Range   | CMYK<br>252  |
| 🔍 Color Space Page | Indexed<br>5 |
| Base Space Range   | CMYK<br>253  |
| 🔍 Color Space Page | Indexed<br>7 |
| Base Space Range   | CMYK<br>8    |
| 🔍 Color Space Page | Indexed<br>8 |





## Color Information

| Item               | Value         |
|--------------------|---------------|
| Base Space Range   | CMYK<br>0     |
| 🔍 Color Space Page | Indexed<br>9  |
| Base Space Range   | CMYK<br>253   |
| 🔍 Color Space Page | Indexed<br>9  |
| Base Space Range   | CMYK<br>87    |
| 🔍 Color Space Page | Indexed<br>9  |
| Base Space Range   | CMYK<br>87    |
| 🔍 Color Space Page | Pattern<br>9  |
| Pattern Type       | Colored Tile  |
| 🔍 Color Space Page | Indexed<br>9  |
| Base Space Range   | CMYK<br>254   |
| 🔍 Color Space Page | Pattern<br>9  |
| Pattern Type       | Colored Tile  |
| 🔍 Color Space Page | Indexed<br>11 |
| Base Space Range   | CMYK<br>242   |
| 🔍 Color Space Page | Indexed<br>11 |
| Base Space Range   | CMYK<br>250   |
| 🔍 Color Space Page | Indexed<br>11 |
| Base Space Range   | CMYK<br>181   |



## Color Information

| Item        | Value   |
|-------------|---------|
| Color Space | Indexed |
| Page        | 11      |
| Base Space  | CMYK    |
| Range       | 250     |
| Color Space | Indexed |
| Page        | 11      |
| Base Space  | CMYK    |
| Range       | 253     |
| Color Space | Indexed |
| Page        | 11      |
| Base Space  | CMYK    |
| Range       | 178     |
| Color Space | Indexed |
| Page        | 11      |
| Base Space  | CMYK    |
| Range       | 192     |
| Color Space | Indexed |
| Page        | 11      |
| Base Space  | CMYK    |
| Range       | 105     |
| Color Space | Indexed |
| Page        | 12      |
| Base Space  | CMYK    |
| Range       | 233     |
| Color Space | Indexed |
| Page        | 12      |
| Base Space  | CMYK    |
| Range       | 225     |
| Color Space | Indexed |
| Page        | 12      |
| Base Space  | CMYK    |
| Range       | 98      |
| Color Space | Indexed |
| Page        | 12      |
| Base Space  | CMYK    |
| Range       | 156     |

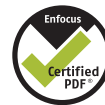

## Color Information

---

| <b>Item</b>   | <b>Value</b> |
|---------------|--------------|
| 🔍 Color Space | Indexed      |
| Page          | 12           |
| Base Space    | CMYK         |
| Range         | 196          |
| 🔍 Color Space | Indexed      |
| Page          | 12           |
| Base Space    | CMYK         |
| Range         | 250          |
| 🔍 Color Space | Indexed      |
| Page          | 12           |
| Base Space    | CMYK         |
| Range         | 222          |



**No output intents**
